# Supplementary material for: High cyclic GMP-AMP synthase and stimulator of interferon genes in cholangiocarcinoma suggest their potential as targets for treatment
Source: PeerJ. 2025 Aug 6;13:e19800. doi: 10.7717/peerj.19800 (PMC12335239; doi:10.7717/peerj.19800)
Supplement: Supplemental Information 4 [file peerj-13-19800-s004.xlsx]

## Sheet: Fig. 1B
		Fig. 1B (Micronuclei number)
			Micronuclei number			Total cell count
			055	213A	D068	055	213A	D068
		1st batch	41	62	66	518	544	522
		2nd batch	37	47	69	517	537	519
		3rd batch	43	56	62	513	534	516
			Micronuclei (%)
			055	213A	D068
		1st batch	7.91506	11.3971	12.6437
		2nd batch	7.15667	8.75233	13.2948
		3rd batch	8.38207	10.4869	12.0155

## Sheet: Fig. 1F
		Fig. 1F (cGAS levels)										Fig. 1F (STING levels)										Fig. 1F (NF-kB p65 levels)
			Band densitometry
			cGAS			GADPH							Band densitometry										Band densitometry
			055	213A	D068	055	213A	D068					STING			GADPH							NF-kB p65			GADPH
		1st batch	0	18081.4	6056.24	16830.5	21740	22317.3					055	213A	D068	055	213A	D068					055	213A	D068	055	213A	D068
		2nd batch	2831.52	17005.6	8086.14	18311.6	21718.9	25124				1st batch	0	4492.49	24092.4	16830.5	21740	22317.3				1st batch	11767.6	14052.2	15219.9	16830.5	21740	22317.3
		3rd batch	1044.92	15484.7	7051.55	22355.2	23627.5	22648.6				2nd batch	0	5077.39	24616.9	18311.6	21718.9	25124				2nd batch	18181.4	22042.4	21862.8	18311.6	21718.9	25124
												3rd batch	0	6242.39	24561.3	22355.2	23627.5	22648.6				3rd batch	17451.5	22790.2	23406.9	22355.2	23627.5	22648.6
			cGAS/GAPDH
			055	213A	D068								STING/GAPDH										NF-kB p65/GAPDH
		1st batch	0	0.83171	0.27137								055	213A	D068								055	213A	D068
		2nd batch	0.15463	0.782987	0.321849							1st batch	0	0.206646	1.07954							1st batch	0.699184	0.646374	0.681977
		3rd batch	0.0467418	0.655371	0.311346							2nd batch	0	0.233777	0.979816							2nd batch	0.992892	1.01489	0.870196
		Average	0.067124	0.756689	0.301521							3rd batch	0	0.264201	1.08445							3rd batch	0.780648	0.964564	1.03348
		SD	0.0793045	0.0910635	0.0266348							Average	0	0.234875	1.04794							Average	0.824241	0.875277	0.861884
												SD	0	0.0287928	0.0590451							SD	0.151629	0.199827	0.175898
			Relative expression (213A =1)
			055	213A	D068								Relative expression (213A =1)										Relative expression (213A =1)
		1st batch	0	1.09914	0.358628								055	213A	D068								055	213A	D068
		2nd batch	0.204351	1.03475	0.425338							1st batch	0	0.879815	4.59624							1st batch	0.798815	0.73848	0.779156
		3rd batch	0.0617714	0.866103	0.411458							2nd batch	0	0.995327	4.17165							2nd batch	1.13437	1.15951	0.994195
		Average	0.0887075	1	0.398475							3rd batch	0	1.12486	4.61715							3rd batch	0.891886	1.10201	1.18075
		SD	0.104805	0.120345	0.0351991							Average	0	1	4.46168							Average	0.941692	1	0.984699
												SD	0	0.122588	0.25139							SD	0.173236	0.228301	0.200963

## Sheet: Fig. 3B
		Fig. 3B (H-score distibution of cGAS, STING, and NF-kB p65)
			H-score
			cGAS	STING	NF-kB p65
			300	300	15
			284	292	48
			297	293	117
			299	298	97
			300	293	58
			300	300	210
			281	290	31
			299	293	206
			298	250	255
			300	300	10
			287	243	255
			300	298	233
			300	299	116
			243	235	88
			298	253	145
			300	300	76
			298	300	283
			300	299	80
			300	300	107
			300	300	50
			300	286	170
			300	300	113
			298	290	98
			297	297	117
			298	292	57
			299	300	135
			300	297	178
			298	293	188
			300	297	215
			300	300	300
			298	300	143
			300	300	106
			300	300	137
			293	293	210
			279	300	90
			298	298	170
			298	296	133
			298	298	115
			300	300	290
			300	300	123
			295	289	80
			300	300	250
			293	299	100
			296	278	67
			300	280	100
			298	293	103
			300	300	280
			285	273	0
			300	299	175
			300	300	73
			300	300	117
			300	300	30
			300	268	100
			295	289	104
			298	300	63
			299	213	50
			280	280	100
			280	297	175
			300	300	50
			299	300	105
			300	300	133
			298	300	114
			300	300	283
			298	300	195
			300	300	295
			300	300	210
			281	259	146
			300	300	150
			300	300	200
			300	296	123
			295	265	233
			293	274	78
			300	293	110
			300	300	270
			300	298	146
			300	300	273
			300	300	217
			300	300	260
			291	290	100
			300	300	255
			287	300	280
			300	298	157
			225	208	143
			300	295	250
			269	248	100
			300	300	230
			288	290	193
			299	300	145
			299	300	174
			300	300	88
			300	300	23
			300	300	225
			300	300	250
			298	298	135
			300	300	236

## Sheet: Fig. 3C
		Tumor stage			Statistical analysis using SPSS
No.	Suvival time (days)	IV	I-III		Comparison of Survival Curves
1	30	1
2	50	1			Log-rank (Mantel-Cox) test
3	71	1			Chi square	4.13
4	78	1			df	1
5	79	1			P value	0.0421
6	105	1			P value summary	*
7	111	1			Are the survival curves sig different?	Yes
8	117	1
9	127	1			Gehan-Breslow-Wilcoxon test
10	154	1			Chi square	1.719
11	157	1			df	1
12	167	1			P value	0.1898
13	210	1			P value summary	ns
14	251	1			Are the survival curves sig different?	No
15	264	1
16	278	1			Median survival
17	299	1			IV	299
18	302	1			I-III	393
19	340	1			Ratio (and its reciprocal)	0.7608	1.314
20	351	1			95% CI of ratio	0.4327 to 1.338	0.7475 to 2.311
21	369	1
22	400	1			Hazard Ratio (Mantel-Haenszel)	A/B	B/A
23	416	1			Ratio (and its reciprocal)	1.828	0.5471
24	430	1			95% CI of ratio	1.022 to 3.270	0.3058 to 0.9788
25	505	1
26	559	1			Hazard Ratio (logrank)	A/B	B/A
27	573	1			Ratio (and its reciprocal)	1.717	0.5825
28	577	1			95% CI of ratio	0.9967 to 2.956	0.3383 to 1.003
29	592	1
30	609	1
31	625	1
32	728	1
33	1438	1
34	64		1
35	82		1
36	83		1
37	149		1
38	157		1
39	167		1
40	237		1
41	266		1
42	302		1
43	393		1
44	457		1
45	471		1
46	754		1
47	785		1
48	963		1
49	1119		1
50	1375		1
51	1929		1
52	2166		1
		1 = Yes

## Sheet: Fig. 3D
		NF-𝛋B p65			Statistical analysis using SPSS
No.	Survival time (days)	High	Low		Comparison of Survival Curves
1	30	1
2	50	1			Log-rank (Mantel-Cox) test
3	64	1			Chi square	11.75
4	71	1			df	1
5	79	1			P value	0.0006
6	82	1			P value summary	***
7	83	1			Are the survival curves sig different?	Yes
8	105	1
9	117	1			Gehan-Breslow-Wilcoxon test
10	149	1			Chi square	11.11
11	154	1			df	1
12	157	1			P value	0.0009
13	157	1			P value summary	***
14	167	1			Are the survival curves sig different?	Yes
15	237	1
16	251	1			Median survival
17	266	1			High	162
18	278	1			Low	436.5
19	340	1			Ratio (and its reciprocal)	0.3711	2.694
20	400	1			95% CI of ratio	0.2155 to 0.6392	1.565 to 4.640
21	430	1
22	471	1			Hazard Ratio (Mantel-Haenszel)	A/B	B/A
23	573	1			Ratio (and its reciprocal)	3.007	0.3326
24	577	1			95% CI of ratio	1.602 to 5.643	0.1772 to 0.6242
25	609	1
26	785	1			Hazard Ratio (logrank)	A/B	B/A
27	78		1		Ratio (and its reciprocal)	2.392	0.418
28	111		1		95% CI of ratio	1.318 to 4.342	0.2303 to 0.7587
29	127		1
30	167		1
31	210		1
32	264		1
33	299		1
34	302		1
35	302		1
36	351		1
37	369		1
38	393		1
39	416		1
40	457		1
41	505		1
42	559		1
43	592		1
44	625		1
45	728		1
46	754		1
47	963		1
48	1119		1
49	1375		1
50	1438		1
51	1929		1
52	2166		1
		1 = Yes

## Sheet: Fig. 4A
		Fig. 4A ( mRNA levels in normal bile duct (NBD) and CCA tissues														Fig. 4A ( mRNA levels in normal bile duct (NBD) and CCA tissues
		GSE26566 dataset														GSE76297 dataset
		Log2 expression														Log2 expression
		CGAS		STING		RELA										CGAS		STING		RELA
		NBD	CCA	NBD	CCA	NBD	CCA									NBD	CCA	NBD	CCA	NBD	CCA
		19.8442	75.9085	161.655	135.958	41.2482	68.052									3.79209	5.57669	6.02349	6.71624	7.82877	7.9229
		16.1956	22.6468	186.532	67.7963	40.4813	106.643									3.66365	4.94367	6.09385	6.19873	7.55243	7.78111
		12.6654	22.4427	181.355	73.6553	18.3754	94.2876									4.01099	6.09926	6.38875	6.93881	7.55745	7.52305
		8.1833	78.1356	174.004	79.682	42.0372	101.654									3.72528	4.90777	6.33165	6.32613	7.11571	7.13548
		19.3768	31.8718	153.03	86.8657	49.8773	82.5497									3.60986	4.16813	6.30056	5.98695	7.90304	7.61803
		19.3347	56.2258	180.165	64.5159	43.4398	84.5284									3.56185	5.18161	6.06233	6.36539	7.78453	7.72884
		48.1169	82.6648	117.748	206.15	85.8316	62.2595									3.85061	4.70125	6.12911	6.02479	7.32262	7.37449
		13.1125	54.317	83.8655	143.942	70.8094	81.343									3.59176	4.67114	6.11391	7.17554	7.82613	7.79484
		25.247	59.6405	74.9468	37.501	90.9928	69.3591									3.84469	5.81111	6.35315	7.05824	7.35098	7.45285
		15.026	68.2101	139.797	285.574	68.5424	77.7012									3.93405	5.71133	6.17789	6.37534	7.59894	7.65157
		30.2906	20.6518	147.629	62.8865	108.153	39.8539									3.81474	4.56826	6.11752	6.69518	7.6575	7.65347
		12.6255	0.758016	132.319	79.9575	69.0752	119.062									3.72676	4.71922	6.06293	6.1566	7.55538	7.9729
		18.737	25.8399	81.3975	159.093	61.5371	49.4458									3.6506	4.40247	6.23527	6.858	7.5947	7.88607
		18.9708	43.4701	92.7416	183.641	69.8907	94.9921									3.80359	4.39635	6.31694	6.68242	7.92523	7.35773
		10.6344	38.0193	83.8303	192.392	54.317	70.55									3.83853	4.71671	6.24337	6.30467	7.62294	7.32881
		18.0081	43.8183	87.5422	102.081	57.0426	29.2233									4.08886	4.00828	6.31595	6.11077	7.4224	7.39711
		14.7251	44.4197	107.12	135.63	64.7636	143.763									3.77464	4.43204	6.29172	6.39441	7.35809	7.96835
		23.6855	53.1358	81.5151	249.502	65.4902	70.7411									3.70559	4.0786	6.15439	6.48271	7.84866	8.02614
		24.0104	74.2573	58.5969	372.15	81.4867	97.1117									3.50499	4.72006	6.14772	6.12604	7.93894	8.01714
		31.0325	19.4071	112.821	118.117	84.7326	15.3362									3.69429	4.68909	6.13799	6.16079	7.72545	7.60842
		22.8433	45.099	127.021	33.4426	40.6798	61.6414									3.63149	4.36547	6.20329	6.13527	7.55832	7.41841
		78.6509	54.6119	325.894	65.2246	90.6055	26.5279									3.67085	4.36891	6.26448	6.67851	8.06066	7.65251
		4.87455	102.116	59.0035	123.186	52.2556	72.95									3.80278	4.07376	6.29629	6.14963	7.59263	7.34636
		23.7614	68.7077	108.449	75.2624	61.2863	67.478									3.79737	4.95619	6.20074	5.93494	7.60405	7.66951
		15.087	98.4778	73.0024	106.537	58.699	55.8986									3.58983	4.37217	6.10296	7.23883	7.82153	7.88599
		4.72234	17.2346	60.1888	63.2272	64.0811	51.8702									4.01245	4.4628	6.26047	6.74372	7.68615	7.47616
		6.67258	18.5028	77.8609	77.0905	76.6938	72.0328									3.71662	4.8592	6.23385	6.69706	8.12741	7.5574
		18.5997	53.836	83.6291	49.3917	137.123	105.873									4.09325	4.60674	6.23031	6.44537	7.83867	7.72682
		19.1536	139.931	180.419	65.0894	71.3269	153.919									3.90829	4.60748	6.50254	6.34174	7.61206	8.20698
		-5.98654	16.4698	66.7706	120.908	59.187	117.827									3.68421	4.31482	6.26624	6.19658	7.87534	7.78013
		1.16769	10.2083	45.0385	63.7866	101.654	56.7952									3.64214	3.871	6.06805	5.74456	7.80777	7.51171
		20.1761	11.4928	35.3198	52.6527	106.795	49.3765									3.64441	4.95803	6.29333	6.54036	7.86138	7.59819
		7.61902	26.3528	33.4222	159.473	86.5085	1.36431									3.73644	3.29273	6.26223	5.84472	7.78395	7.59073
		5.2532	64.1029	86.7186	168.271	112.14	53.3168									3.68752	4.53046	6.26306	7.15296	7.35971	7.42754
		-5.53364	22.4494	56.3239	96.1946	84.618	88.8657									3.53317	4.67488	6.14406	6.67174	7.6242	7.42509
		14.3392	27.004	84.1303	56.4366	73.9396	44.7311									3.61447	4.21046	6.32176	6.93804	7.7445	7.84578
		3.11928	106.088	28.9744	384.165	59.3279	90.1938									3.7224	5.46591	6.35121	7.29596	7.61679	8.41561
		14.2187	26.157	65.2712	81.2618	101.02	131.172									3.6589	3.95435	6.10406	6.14432	7.86305	7.77415
		6.96577	10.3293	21.4003	50.2168	57.4955	138.623									3.81678	5.07299	6.26411	6.80743	7.34763	7.48478
		12.0096	60.6405	55.8418	64.95	33.584	75.2116									3.85014	5.01008	6.19575	6.26116	7.48365	8.04865
		32.4665	26.9939	62.104	209.55	86.4488	66.3104									3.75481	4.67053	6.277	6.73992	7.5898	7.95519
		12.6693	35.5295	32.5231	136.679	37.0504	100.229									3.65506	5.90214	6.23047	6.82648	7.72234	7.92648
		22.8741	83.6031	49.6598	319.749	76.6182	88.0559									3.74528	5.07572	6.29914	6.39568	7.55654	8.16721
		-0.155135	40.0197	78.4352	144.558	79.3564	99.6186									3.71179	3.69417	6.06861	6.11083	7.86169	7.53157
		2.48874	30.084	44.2646	392.448	16.0157	165.179									3.99113	4.25309	6.48602	6.24269	7.50124	7.83875
		15.6503	45.9048	40.09	137.895	79.8144	117.294									3.51065	4.86861	6.14367	6.06431	7.63801	7.58822
		5.61157	13.7923	90.8704	139.567	69.8222	189.627									3.66653	5.2444	6.27841	6.75762	7.48975	7.45838
		6.90177	33.5307	43.2793	314.82	40.4944	11.4888									3.92799	4.52715	6.38045	6.49647	7.45323	7.41583
		8.66329	77.7554	56.0719	345.496	11.2697	24.8619									3.70437	3.72359	6.30375	6.65244	7.47257	8.23823
		441.993	82.4657	8.39645	156.11	8.6129	48.0972									3.67924	4.47087	6.30167	6.8314	7.95336	7.79883
		10.9769	87.5987	58.0181	82.2278	19.8322	51.4306									3.67261	4.82462	6.28499	6.93418	7.82108	7.83721
		4.86113	33.3322	44.669	130.532	84.8186	206.009									3.63439	5.6257	6.2213	6.64719	7.70379	7.67724
		-4.24904	-4.5192	43.2793	251.47	57.0593	10.9511									3.90812	3.90306	6.6043	6.47868	7.59563	7.31806
		-1.62181	14.1734	37.2351	138.133	38.3846	118.36									3.71017	4.62969	6.40663	6.71764	7.38695	7.95266
		5.47826	24.1389	16.6373	361.427	81.6299	25.247									3.77011	4.30741	6.04521	6.3271	7.55275	7.83397
		16.9479	11.8169	69.1458	199.626	68.6145	9.84511									3.48065	5.06981	6.12542	6.79394	7.66434	8.19469
		4.85033	12.6654	71.109	101.582	112.425	21.631									5.01073	4.95708	6.24836	6.17511	7.86138	7.62627
		10.5437	9.74988	38.8523	177.993	50.8464	78.4896									3.70822	5.46959	6.25239	6.67249	7.79547	7.64949
		5.38854	43.5635	15.5618	382.003	66.6514	70.3308									3.76412	4.59705	6.29919	7.15497	7.67023	7.5896
		1.30657	30.8467	30.5193	341.774	47.4071	99.3731									3.72671	4.78377	6.3079	6.83007	7.71876	7.53358
		11.0791	40.0769	50.1318	375.829	35.2109	118.204									3.68913	4.66232	6.06307	6.7055	7.63662	7.80018
		7.4089	13.5821	82.6648	91.3716	13.0002	85.8949									3.87633	4.54037	6.35287	6.51842	7.56951	7.75737
		23.0169	20.7955	92.5147	117.254	64.8328	43.3095									3.72783	4.44006	6.16142	6.60972	7.49629	7.99819
		12.0249	22.1084	53.3914	165.688	90.2515	79.8409									3.84806	4.58991	6.45651	6.16005	7.74883	7.86823
		28.1223	16.9056	66.2858	231.592	71.8357	54.219									3.78183	6.29638	6.21818	6.5708	7.61481	7.98394
		19.8442	7.61002	161.655	55.2469	41.2482	110.462									3.50489	4.76256	6.0331	6.76026	7.68242	7.87406
		16.1956	10.586	186.532	198.303	40.4813	52.1637									4.36126	5.50055	6.72775	7.4854	7.56601	8.01385
		12.6654	13.8303	181.355	313.563	18.3754	51.2366									3.68174	4.91073	6.29676	6.41207	7.8747	8.18711
		8.1833	19.8759	174.004	232.776	42.0372	57.1155									3.7992	4.51743	6.22267	6.70027	7.69667	7.18543
		19.3768	56.3239	153.03	202.595	49.8773	74.4481									3.73144	4.79705	6.28391	7.06016	7.4142	8.12189
		19.3347	25.9771	180.165	252.702	43.4398	69.2609									3.79764	4.81673	6.39191	6.44176	7.67393	7.22607
			19.1432		103.23		74.844									3.82577	5.08373	6.39766	6.29373	7.45619	7.93725
			9.75679		135.63		89.1114									3.41704	4.71228	6.23583	6.44697	7.83716	7.25827
			53.8176		267.688		105.839									3.88598	4.84637	6.52914	6.73657	7.44295	7.76044
			19.3647		24.5626		101.273									3.61794	4.09442	6.27611	6.64867	7.70054	7.54122
			61.662		419.761		55.5555									3.86697	4.76942	6.3275	6.49584	7.41284	7.53615
			18.0863		31.9166		102.564									3.78234	4.26557	6.09339	6.92987	7.62531	7.83779
			15.3918		144.558		48.2696									3.7277	4.50985	6.04565	6.95599	7.62306	7.90554
			28.422		23.1217		63.7645									3.63916	3.80373	6.04942	6.34166	7.73866	7.65914
			54.4342		349.958		57.969									3.86909	5.3259	6.12329	6.96503	7.36971	7.71044
			19.5551		104.76		40.1157									3.53799	4.4131	6.23686	6.26478	7.82139	7.5823
			29.6576		101.337		55.9912									3.8641	4.12601	6.32058	6.92011	7.4183	7.70698
			41.7654		277.605		68.163									3.63468	4.27478	6.26762	6.65444	7.84443	7.78401
			67.605		527.087		96.2629									3.64725	4.75636	6.20189	6.62587	7.70208	8.16197
			33.4649		247.514		84.3267									3.73764	4.85182	6.14434	6.52158	7.59698	7.72029
			2.33641		36.4159		87.3584									3.80788	5.10487	6.40399	5.93793	7.22117	7.77531
			14.7741		39.2161		71.3496									3.57847	4.7189	6.1696	6.88546	7.77309	7.76208
			9.0434		81.149		-8.06622									3.8954	4.45702	6.41636	6.71657	7.63595	8.29099
			60.4976		219.382		62.7218									3.67353	4.32254	6.50151	6.74498	7.84732	7.96396
			26.157		74.198		27.5403									4.07	4.65207	6.63641	6.27932	7.47983	7.94629
			38.4223		77.6278		35.6744									3.7634	4.38011	6.23228	6.79724	7.70694	7.93877
			29.864		49.6442		68.0299									3.65953		6.30436		7.53435
			27.467		29.4092		97.2809
			28.6091		88.1843		119.18
			43.3901		273.589		105.505
			12.7642		57.3762		70.8892
			20.3483		41.6196		88.6483
			12.9931		44.1132		161.875
			54.5094		269.065		52.44
			6.31095		24.1547		49.4078
			54.6295		120.613		93.487
			23.4483		167.185		64.5159
			18.1962		264.089		41.8331
			21.7435		90.7328		51.413

## Sheet: Fig. 4B
		Fig. 4B (The correlation between 2 distinct mRNA levels)										Fig. 4B (The correlation between 2 distinct mRNA levels)
		GSE26566 dataset										GSE76297 dataset
		Log2 expression										Log2 expression
		CGAS	STING	RELA								CGAS	STING	RELA
		75.9085	135.958	68.052								5.57669	6.71624	7.9229
		22.6468	67.7963	106.643								4.94367	6.19873	7.78111
		22.4427	73.6553	94.2876								6.09926	6.93881	7.52305
		78.1356	79.682	101.654								4.90777	6.32613	7.13548
		31.8718	86.8657	82.5497								4.16813	5.98695	7.61803
		56.2258	64.5159	84.5284								5.18161	6.36539	7.72884
		82.6648	206.15	62.2595								4.70125	6.02479	7.37449
		54.317	143.942	81.343								4.67114	7.17554	7.79484
		59.6405	37.501	69.3591								5.81111	7.05824	7.45285
		68.2101	285.574	77.7012								5.71133	6.37534	7.65157
		20.6518	62.8865	39.8539								4.56826	6.69518	7.65347
		0.758016	79.9575	119.062								4.71922	6.1566	7.9729
		25.8399	159.093	49.4458								4.40247	6.858	7.88607
		43.4701	183.641	94.9921								4.39635	6.68242	7.35773
		38.0193	192.392	70.55								4.71671	6.30467	7.32881
		43.8183	102.081	29.2233								4.00828	6.11077	7.39711
		44.4197	135.63	143.763								4.43204	6.39441	7.96835
		53.1358	249.502	70.7411								4.0786	6.48271	8.02614
		74.2573	372.15	97.1117								4.72006	6.12604	8.01714
		19.4071	118.117	15.3362								4.68909	6.16079	7.60842
		45.099	33.4426	61.6414								4.36547	6.13527	7.41841
		54.6119	65.2246	26.5279								4.36891	6.67851	7.65251
		102.116	123.186	72.95								4.07376	6.14963	7.34636
		68.7077	75.2624	67.478								4.95619	5.93494	7.66951
		98.4778	106.537	55.8986								4.37217	7.23883	7.88599
		17.2346	63.2272	51.8702								4.4628	6.74372	7.47616
		18.5028	77.0905	72.0328								4.8592	6.69706	7.5574
		53.836	49.3917	105.873								4.60674	6.44537	7.72682
		139.931	65.0894	153.919								4.60748	6.34174	8.20698
		16.4698	120.908	117.827								4.31482	6.19658	7.78013
		10.2083	63.7866	56.7952								3.871	5.74456	7.51171
		11.4928	52.6527	49.3765								4.95803	6.54036	7.59819
		26.3528	159.473	1.36431								3.29273	5.84472	7.59073
		64.1029	168.271	53.3168								4.53046	7.15296	7.42754
		22.4494	96.1946	88.8657								4.67488	6.67174	7.42509
		27.004	56.4366	44.7311								4.21046	6.93804	7.84578
		106.088	384.165	90.1938								5.46591	7.29596	8.41561
		26.157	81.2618	131.172								3.95435	6.14432	7.77415
		10.3293	50.2168	138.623								5.07299	6.80743	7.48478
		60.6405	64.95	75.2116								5.01008	6.26116	8.04865
		26.9939	209.55	66.3104								4.67053	6.73992	7.95519
		35.5295	136.679	100.229								5.90214	6.82648	7.92648
		83.6031	319.749	88.0559								5.07572	6.39568	8.16721
		40.0197	144.558	99.6186								3.69417	6.11083	7.53157
		30.084	392.448	165.179								4.25309	6.24269	7.83875
		45.9048	137.895	117.294								4.86861	6.06431	7.58822
		13.7923	139.567	189.627								5.2444	6.75762	7.45838
		33.5307	314.82	11.4888								4.52715	6.49647	7.41583
		77.7554	345.496	24.8619								3.72359	6.65244	8.23823
		82.4657	156.11	48.0972								4.47087	6.8314	7.79883
		87.5987	82.2278	51.4306								4.82462	6.93418	7.83721
		33.3322	130.532	206.009								5.6257	6.64719	7.67724
		-4.5192	251.47	10.9511								3.90306	6.47868	7.31806
		14.1734	138.133	118.36								4.62969	6.71764	7.95266
		24.1389	361.427	25.247								4.30741	6.3271	7.83397
		11.8169	199.626	9.84511								5.06981	6.79394	8.19469
		12.6654	101.582	21.631								4.95708	6.17511	7.62627
		9.74988	177.993	78.4896								5.46959	6.67249	7.64949
		43.5635	382.003	70.3308								4.59705	7.15497	7.5896
		30.8467	341.774	99.3731								4.78377	6.83007	7.53358
		40.0769	375.829	118.204								4.66232	6.7055	7.80018
		13.5821	91.3716	85.8949								4.54037	6.51842	7.75737
		20.7955	117.254	43.3095								4.44006	6.60972	7.99819
		22.1084	165.688	79.8409								4.58991	6.16005	7.86823
		16.9056	231.592	54.219								6.29638	6.5708	7.98394
		7.61002	55.2469	110.462								4.76256	6.76026	7.87406
		10.586	198.303	52.1637								5.50055	7.4854	8.01385
		13.8303	313.563	51.2366								4.91073	6.41207	8.18711
		19.8759	232.776	57.1155								4.51743	6.70027	7.18543
		56.3239	202.595	74.4481								4.79705	7.06016	8.12189
		25.9771	252.702	69.2609								4.81673	6.44176	7.22607
		19.1432	103.23	74.844								5.08373	6.29373	7.93725
		9.75679	135.63	89.1114								4.71228	6.44697	7.25827
		53.8176	267.688	105.839								4.84637	6.73657	7.76044
		19.3647	24.5626	101.273								4.09442	6.64867	7.54122
		61.662	419.761	55.5555								4.76942	6.49584	7.53615
		18.0863	31.9166	102.564								4.26557	6.92987	7.83779
		15.3918	144.558	48.2696								4.50985	6.95599	7.90554
		28.422	23.1217	63.7645								3.80373	6.34166	7.65914
		54.4342	349.958	57.969								5.3259	6.96503	7.71044
		19.5551	104.76	40.1157								4.4131	6.26478	7.5823
		29.6576	101.337	55.9912								4.12601	6.92011	7.70698
		41.7654	277.605	68.163								4.27478	6.65444	7.78401
		67.605	527.087	96.2629								4.75636	6.62587	8.16197
		33.4649	247.514	84.3267								4.85182	6.52158	7.72029
		2.33641	36.4159	87.3584								5.10487	5.93793	7.77531
		14.7741	39.2161	71.3496								4.7189	6.88546	7.76208
		9.0434	81.149	-8.06622								4.45702	6.71657	8.29099
		60.4976	219.382	62.7218								4.32254	6.74498	7.96396
		26.157	74.198	27.5403								4.65207	6.27932	7.94629
		38.4223	77.6278	35.6744								4.38011	6.79724	7.93877
		29.864	49.6442	68.0299
		27.467	29.4092	97.2809
		28.6091	88.1843	119.18
		43.3901	273.589	105.505
		12.7642	57.3762	70.8892
		20.3483	41.6196	88.6483
		12.9931	44.1132	161.875
		54.5094	269.065	52.44
		6.31095	24.1547	49.4078
		54.6295	120.613	93.487
		23.4483	167.185	64.5159
		18.1962	264.089	41.8331
		21.7435	90.7328	51.413
