# Supplementary material for: High cyclic GMP-AMP synthase and stimulator of interferon genes in cholangiocarcinoma suggest their potential as targets for treatment
Source: PeerJ. 2025 Aug 6;13:e19800. doi: 10.7717/peerj.19800 (PMC12335239; doi:10.7717/peerj.19800)
Supplement: Supplemental Information 6 [file peerj-13-19800-s006.xlsx]

## Sheet: 95 cases
No.	Code	Sex	Age	Survival day	Status	Anatomical	TNM	TNM Stage	Stage	Histological type	Tumor size	NF-kB p65	cGAS	STING
1	A004	M	52	862	DD	PC	T4N1Mx	4	IVA	pap		15	300	300
2	A011	M	53	935	DD	PC	T2bNxMx	2	II	pap		48	284	292
3	A017	F	52	523	DD	IC	T2bNxM0	2	II	pap		117	297	293
4	A035	F	49	167	DD	IC	T3N0Mx	3	III	non-pap(WD)	3	97	299	298
5	A039	F	72	1119	DD	IC	T3N0Mx	3	III	non-pap(WD)	6	58	300	293
6	A042	F	52	945	DD	IC	T3N1M0	4	IVA	pap	10	210	300	300
7	A059	M	46	625	DD	IC	T4N0Mx	4	IVA	non-pap		31	281	290
8	A064	M	49	71	DD	IC	T4N1M0	4	IVA	non-pap(WD)	7	206	299	293
9	A074	M	55	154	DD	IC	T4N0Mx	4	IVA	non-pap(WD)	11	255	298	250
10	A080	M	50	377	DD	PC	T4N1M0	4	IVA	pap		10	300	300
11	A096	F	76	440	DD	PC	T2bN0M0	2	II	pap		255	287	243
12	A100	M	53	30	DD	PC	T4NxM0	4	IVA	non-pap(WD-MF)		233	300	298
13	A105	M	53	592	DD	IC	T4N1Mx	4	IVA	non-pap(WD-MF)	3.5	116	300	299
14	A107	M	54	302	DD	IC	T3N0Mx	3	III	non-pap(WD-MF)	6	88	243	235
15	A119	F	51	358	DD	IC	T3N0Mx	3	III	pap	10	145	298	253
16	A120	F	53	156	DD	IC	T3N0Mx	3	III	pap	9	76	300	300
17	A128	M	61	252	DD	IC	T3NxM0	3	III	pap		283	298	300
18	A132	M	61	369	DD	PC	T4N1M0	4	IVA	non-pap(WD)		80	300	299
19	A142	F	38	559	DD	IC	T2aN1M1	4	IVB	non-pap(WD)	14	107	300	300
20	A150	M	64	256	DD	PC	T4N0M0	4	IVA	pap		50	300	300
21	A153	M	60	360	DD	IC	T3N0M0	3	III	pap		170	300	286
22	A157	M	51	1135	DD	PC	T2aN0M0	2	II	pap	3	113	300	300
23	A162	M	68	731	DD	IC	T3N1M0	4	IVA	pap		98	298	290
24	B005	M	50	127	DD	PC	T4N1M0	4	IVA	non-pap(WD)	6	117	297	297
25	C008	M	47	384	DD	IC	T4NxM0	4	IVA	pap	10	57	298	292
26	B017	M	53	573	DD	PC	T4N0M0	4	IVA	non-pap(WD)	6	135	299	300
27	B032	M	53	237	DD	IC	T3N0Mx	3	III	non-pap(MD-MF)	7	178	300	297
28	B083	F	53	266	DD	IC	T3N0Mx	3	III	non-pap(WD)	9	188	298	293
29	B085	M	73	82	DD	IC	T3N0Mx	3	III	non-pap(WD)	7	215	300	297
30	B087	M	56	785	DD	IC	T2bN0M0	2	II	non-pap(WD)	15	300	300	300
31	B099	M	48	471	DD	IC	T3N0Mx	3	III	non-Pap(WD)	9	143	298	300
32	B103	M	63	111	DD	PC	T4N1M0	4	IVA	non-pap(WD)	10	106	300	300
33	B149	M	63	430	DD	PC	T4N0M0	4	IVA	non-pap(WD)	5	137	300	300
34	C054	M	44	167	DD	IC	T3N1Mx	4	IVA	non-pap(MD)	9	210	293	293
35	C061	F	60	393	DD	PC	T3N0Mx	3	IIIA	non-pap(WD)	2	90	279	300
36	C078	M	42	278	DD	IC	T3N1Mx	4	IVA	non-pap (WD)	6	170	298	298
37	C084	M	62	728	DD	IC	T4NxMx	4	IVA	non-pap(WD)	5	133	298	296
38	C080	F	69	1438	DD	IC	T3N1Mx	4	IVA	non-pap(WD)	6.5	115	298	298
39	C095	M	59	351	DD	IC	T3N1M1	4	IVB	pap	7.5	290	300	300
40	C105	F	48	1375	DD	IC	T1N0Mx	1	I	non-pap(WD)	18	123	300	300
41	C107	F	49	115	DD	IC	T3N1Mx	4	IVA	pap	7	80	295	289
42	C128	F	43	79	DD	IC	T3N1Mx	4	IVA	non-pap(WD)	8	250	300	300
43	C144	M	52	1354	DD	IC	T4N0Mx	4	IVA	pap	5	100	293	299
44	C150	M	57	1069	DD	PC	T3NxMX	3	IIIA	pap	3	67	296	278
45	C151	M	73	542	DD	IC	T1N0Mx	1	I	pap	7	100	300	280
46	C154	M	59	212	DD	PC	T2bN1Mx	3	IIIB	pap	7	103	298	293
47	C164	F	60	488	DD	IC	T3N1Mx	4	IVA	pap	5.5	280	300	300
48	C167	M	64	505	DD	IC	T4N1Mx	4	IVA	non-pap(WD)	8	0	285	273
49	C176	M	49	577	DD	PC	T3N0M1	4	IVB	non-pap(WD)	7	175	300	299
50	D005	F	72	302	DD	PC	T3N0M1	4	IVB	non-pap(WD)	6	73	300	300
51	D013	M	50	523	DD	PC	T1N0M0	1	I	pap		117	300	300
52	D017	F	53	1162	DD	IC	T2aN0Mx	2	II	pap	6	30	300	300
53	D029	M	64	457	DD	IC	T3N0Mx	3	III	non-pap	5	100	300	268
54	D039	F	67	109	DD	IC	T4NxMx	4	IVA	pap	5	104	295	289
55	D042	M	56	2166	DD	PC	T2bN0Mx	2	II	non-pap(WD)	8	63	298	300
56	D049	M	55	963	DD	IC	T2bN0Mx	2	II	non-pap(WD)	18	50	299	213
57	D053	M	62	381	DD	IC	T3N0Mx	3	III	pap	12.5	100	280	280
58	D058	F	64	105	DD	IC	T3N1M0	4	IVA	non-pap(WD)	8	175	280	297
59	D069	M	48	1929	DD	PC	T2bN1Mx	3	IIIB	non-pap(WD)	4	50	300	300
60	D070	M	65	299	DD	IC	T4N1M1	4	IVB	non-pap(WD)	12	105	299	300
61	D078	M	40	264	DD	PC	T4N1Mx	4	IVA	non-pap(WD)	4	133	300	300
62	D096	F	45	78	DD	PC	T4N1Mx	4	IVA	non-pap(WD)	7	114	298	300
63	D106	M	54	373	DD	PC	T4N1Mx	4	IVA	pap	3	283	300	300
64	D113	M	70	297	DD	IC	T3N0Mx	3	III	pap	5	195	298	300
65	D131	M	66	50	DD	IC	T3N1M0	4	IVA	non-pap(WD)	15	295	300	300
66	D138	F	60	83	DD	IC	T3NxMx	3	III	non-pap	8	210	300	300
67	E025	F	57	34	DD	PC	T4N1Mx	4	IVA	pap	7	146	281	259
68	E028	M	51	187	DD	IC	T3N0Mx	3	III	pap	11	150	300	300
69	E030	M	64	149	DD	PC	T2bN1M0	3	III	non-pap	6	200	300	300
70	E053	F	61	506	DD	PC	T2aN1M0	3	III	pap		123	300	296
71	E066	M	70	400	DD	IC	T3N1Mx	4	IVA	non-pap	6	233	295	265
72	E071	F	60	346	DD	IC	T4N1Mx	4	IVA	pap	5	78	293	274
73	F044	F	42	1361	DD	PC	T2bN0Mx	2	II	pap	5	110	300	293
74	F004	M	65	72	DD	PC	T3N1Mx	3	IIIB	pap	6	270	300	300
75	F009	M	68	1199	DD	IC	T1N0Mx	1	I	pap	7	146	300	298
76	R100	F	49	251	DD	PC	T4N1M0	4	IVA	non-pap(WD)	9	273	300	300
77	R104	F	63	117	DD	IC	T3N1Mx	4	IVA	non-pap (WD)	10	217	300	300
78	R149	M	37	475	DD	PC	T2bNxM0	2	II	pap	5	260	300	300
79	T157	M	41	351	DD	IC	T4N0M0	4	IVA	non-pap(WD)	5	100	291	290
80	T160	M	46	2493	DD	IC	T4N0Mx	4	IVA	pap	6.8	255	300	300
81	U027	F	66	148	DD	IC	T1N0M0	1	I	pap	1	280	287	300
82	W040	M	56	157	DD	IC	T4NxMx	4	IVA	non-pap(WD)	10	157	300	298
83	W039	M	66	64	DD	IC	T3N0Mx	3	III	non-pap(WD-MF)	6	143	225	208
84	Y002	F	45	1868	DD	IC	T3N0M0	3	III	pap(IF-ID)	10	250	300	295
85	Y019	M	70	210	DD	IC	T4N0Mx	4	IVA	non-pap(WD)	6	100	269	248
86	Y020	M	50	180	DD	IC	T3N1Mx	4	IVA	pap	14	230	300	300
87	Y023	M	62	1302	DD	IC	T4N0Mx	4	IVA	pap	6	193	288	290
88	Y032	M	69	429	DD	IC	T3N1Mx	4	IVA	pap	8	145	299	300
89	Y033	F	51	157	DD	IC	T1NxMx	1	I	non-pap(WD-MF)	4	174	299	300
90	Y035	F	64	754	DD	IC	T3N0Mx	3	III	non-pap (WD+MF)	4	88	300	300
91	Y057	M	57	416	DD	IC	T4N1Mx	4	IVA	Non-pap (WD)	7	23	300	300
92	Y065	M	63	558	DD	IC	T4N1Mx	4	IVA	pap	7	225	300	300
93	Y091	F	51	609	DD	PC	T4NxM0	4	IVA	non-pap(WD)		250	300	300
94	Y123	M	55	340	DD	PC	T4NxM0	4	IVA	non-pap (WD)		135	298	298
95	Y140	F	56	2593	DD	PC	T1N0M0	1	I	pap		236	300	300

## Sheet: non-pap
No.	Code	Sex	Sex (G)	Age	Age (G)	Survival day	Status	Status (G)	Anatomical	Anatomical (G)	TNM	TNM Stage	TNM Stage (G)	Stage	Histological type	Histological type (G)	Tumor size	Tumor size (G)	NF-kB p65	NF-kB p65 (G)	cGAS	cGASG	STING	STINGG
1	A035	F	0	49	1	167	DD	0	IC	0	T3N0Mx	3	1	III	non-pap(WD)	0	3	1	97	1	299	1	298	1
2	A039	F	0	72	0	1119	DD	0	IC	0	T3N0Mx	3	1	III	non-pap(WD)	0	6	1	58	1	300	0	293	1
3	A059	M	1	46	1	625	DD	0	IC	0	T4N0Mx	4	0	IVA	non-pap	0			31	1	281	1	290	1
4	A064	M	1	49	1	71	DD	0	IC	0	T4N1M0	4	0	IVA	non-pap(WD)	0	7	0	206	0	299	1	293	1
5	A074	M	1	55	1	154	DD	0	IC	0	T4N0Mx	4	0	IVA	non-pap(WD)	0	11	0	255	0	298	1	250	1
6	A100	M	1	53	1	30	DD	0	PC	1	T4NxM0	4	0	IVA	non-pap(WD-MF)	0			233	0	300	0	298	1
7	A105	M	1	53	1	592	DD	0	IC	0	T4N1Mx	4	0	IVA	non-pap(WD-MF)	0	3.5	1	116	1	300	0	299	1				Non-pap	Pap
8	A107	M	1	54	1	302	DD	0	IC	0	T3N0Mx	3	1	III	non-pap(WD-MF)	0	6	1	88	1	243	1	235	1			cGAS_low_STING_low	0	15
9	A132	M	1	61	0	369	DD	0	PC	1	T4N1M0	4	0	IVA	non-pap(WD)	0			80	1	300	0	299	1			cGAS_high_STING_high	0	18
10	A142	F	0	38	1	559	DD	0	IC	0	T2aN1M1	4	0	IVB	non-pap(WD)	0	14	0	107	1	300	0	300	0			Divergent pair group	0	10
11	B005	M	1	50	1	127	DD	0	PC	1	T4N1M0	4	0	IVA	non-pap(WD)	0	6	1	117	1	297	1	297	1
12	B017	M	1	53	1	573	DD	0	PC	1	T4N0M0	4	0	IVA	non-pap(WD)	0	6	1	135	0	299	1	300	0
13	B032	M	1	53	1	237	DD	0	IC	0	T3N0Mx	3	1	III	non-pap(MD-MF)	0	7	0	178	0	300	0	297	1
14	B083	F	0	53	1	266	DD	0	IC	0	T3N0Mx	3	1	III	non-pap(WD)	0	9	0	188	0	298	1	293	1
15	B085	M	1	73	0	82	DD	0	IC	0	T3N0Mx	3	1	III	non-pap(WD)	0	7	0	215	0	300	0	297	1
16	B087	M	1	56	0	785	DD	0	IC	0	T2bN0M0	2	1	II	non-pap(WD)	0	15	0	300	0	300	0	300	0
17	B099	M	1	48	1	471	DD	0	IC	0	T3N0Mx	3	1	III	non-Pap(WD)	0	9	0	143	0	298	1	300	0
18	B103	M	1	63	0	111	DD	0	PC	1	T4N1M0	4	0	IVA	non-pap(WD)	0	10	0	106	1	300	0	300	0
19	B149	M	1	63	0	430	DD	0	PC	1	T4N0M0	4	0	IVA	non-pap(WD)	0	5	1	137	0	300	0	300	0
20	C054	M	1	44	1	167	DD	0	IC	0	T3N1Mx	4	0	IVA	non-pap(MD)	0	9	0	210	0	293	1	293	1
21	C061	F	0	60	0	393	DD	0	PC	1	T3N0Mx	3	1	IIIA	non-pap(WD)	0	2	1	90	1	279	1	300	0
22	C078	M	1	42	1	278	DD	0	IC	0	T3N1Mx	4	0	IVA	non-pap (WD)	0	6	1	170	0	298	1	298	1
23	C084	M	1	62	0	728	DD	0	IC	0	T4NxMx	4	0	IVA	non-pap(WD)	0	5	1	133	1	298	1	296	1
24	C080	F	0	69	0	1438	DD	0	IC	0	T3N1Mx	4	0	IVA	non-pap(WD)	0	6.5	1	115	1	298	1	298	1
25	C105	F	0	48	1	1375	DD	0	IC	0	T1N0Mx	1	1	I	non-pap(WD)	0	18	0	123	1	300	0	300	0
26	C128	F	0	43	1	79	DD	0	IC	0	T3N1Mx	4	0	IVA	non-pap(WD)	0	8	0	250	0	300	0	300	0
27	C167	M	1	64	0	505	DD	0	IC	0	T4N1Mx	4	0	IVA	non-pap(WD)	0	8	0	0	1	285	1	273	1
28	C176	M	1	49	1	577	DD	0	PC	1	T3N0M1	4	0	IVB	non-pap(WD)	0	7	0	175	0	300	0	299	1
29	D005	F	0	72	0	302	DD	0	PC	1	T3N0M1	4	0	IVB	non-pap(WD)	0	6	1	73	1	300	0	300	0
30	D029	M	1	64	0	457	DD	0	IC	0	T3N0Mx	3	1	III	non-pap	0	5	1	100	1	300	0	268	1
31	D042	M	1	56	0	2166	DD	0	PC	1	T2bN0Mx	2	1	II	non-pap(WD)	0	8	0	63	1	298	1	300	0
32	D049	M	1	55	1	963	DD	0	IC	0	T2bN0Mx	2	1	II	non-pap(WD)	0	18	0	50	1	299	1	213	1
33	D058	F	0	64	0	105	DD	0	IC	0	T3N1M0	4	0	IVA	non-pap(WD)	0	8	0	175	0	280	1	297	1
34	D069	M	1	48	1	1929	DD	0	PC	1	T2bN1Mx	3	1	IIIB	non-pap(WD)	0	4	1	50	1	300	0	300	0
35	D070	M	1	65	0	299	DD	0	IC	0	T4N1M1	4	0	IVB	non-pap(WD)	0	12	0	105	1	299	1	300	0
36	D078	M	1	40	1	264	DD	0	PC	1	T4N1Mx	4	0	IVA	non-pap(WD)	0	4	1	133	1	300	0	300	0
37	D096	F	0	45	1	78	DD	0	PC	1	T4N1Mx	4	0	IVA	non-pap(WD)	0	7	0	114	1	298	1	300	0
38	D131	M	1	66	0	50	DD	0	IC	0	T3N1M0	4	0	IVA	non-pap(WD)	0	15	0	295	0	300	0	300	0
39	D138	F	0	60	0	83	DD	0	IC	0	T3NxMx	3	1	III	non-pap	0	8	0	210	0	300	0	300	0
40	E030	M	1	64	0	149	DD	0	PC	1	T2bN1M0	3	1	III	non-pap	0	6	1	200	0	300	0	300	0
41	E066	M	1	70	0	400	DD	0	IC	0	T3N1Mx	4	0	IVA	non-pap	0	6	1	233	0	295	1	265	1
42	R100	F	0	49	1	251	DD	0	PC	1	T4N1M0	4	0	IVA	non-pap(WD)	0	9	0	273	0	300	0	300	0
43	R104	F	0	63	0	117	DD	0	IC	0	T3N1Mx	4	0	IVA	non-pap (WD)	0	10	0	217	0	300	0	300	0
44	T157	M	1	41	1	351	DD	0	IC	0	T4N0M0	4	0	IVA	non-pap(WD)	0	5	1	100	1	291	1	290	1
45	W040	M	1	56	0	157	DD	0	IC	0	T4NxMx	4	0	IVA	non-pap(WD)	0	10	0	157	0	300	0	298	1
46	W039	M	1	66	0	64	DD	0	IC	0	T3N0Mx	3	1	III	non-pap(WD-MF)	0	6	1	143	0	225	1	208	1
47	Y019	M	1	70	0	210	DD	0	IC	0	T4N0Mx	4	0	IVA	non-pap(WD)	0	6	1	100	1	269	1	248	1
48	Y033	F	0	51	1	157	DD	0	IC	0	T1NxMx	1	1	I	non-pap(WD-MF)	0	4	1	174	0	299	1	300	0
49	Y035	F	0	64	0	754	DD	0	IC	0	T3N0Mx	3	1	III	non-pap (WD+MF)	0	4	1	88	1	300	0	300	0
50	Y057	M	1	57	0	416	DD	0	IC	0	T4N1Mx	4	0	IVA	Non-pap (WD)	0	7	0	23	1	300	0	300	0
51	Y091	F	0	51	1	609	DD	0	PC	1	T4NxM0	4	0	IVA	non-pap(WD)	0			250	0	300	0	300	0
52	Y123	M	1	55	1	340	DD	0	PC	1	T4NxM0	4	0	IVA	non-pap (WD)	0			135	0	298	1	298	1
				55
				56								4					7		134		299.5		299
																			135		300		300

## Sheet: pap
No.	Code	Sex	Sex (G)	Age	Age (G)	Survival day	Status	Status (G)	Anatomical	Anatomical (G)	TNM	TNM Stage	TNM Stage (G)	Stage	Histological type	Histological type (G)	Tumor size	Tumor size (G)	NF-kB p65	NF-kB p65 (G)	cGAS	cGASG	STING	STINGG
1	A004	M	1	52	1	862	DD	0	PC	1	T4N1Mx	4	0	IVA	pap	1			15	1	300	0	300	0
2	A011	M	1	53	1	935	DD	0	PC	1	T2bNxMx	2	1	II	pap	1			48	1	284	1	292	1
3	A017	F	0	52	1	523	DD	0	IC	0	T2bNxM0	2	1	II	pap	1			117	1	297	1	293	1
4	A042	F	0	52	1	945	DD	0	IC	0	T3N1M0	4	0	IVA	pap	1	10	0	210	0	300	0	300	0
5	A080	M	1	50	1	377	DD	0	PC	1	T4N1M0	4	0	IVA	pap	1			10	1	300	0	300	0
6	A096	F	0	76	0	440	DD	0	PC	1	T2bN0M0	2	1	II	pap	1			255	0	287	1	243	1
7	A119	F	0	51	1	358	DD	0	IC	0	T3N0Mx	3	1	III	pap	1	10	0	145	0	298	1	253	1
8	A120	F	0	53	1	156	DD	0	IC	0	T3N0Mx	3	1	III	pap	1	9	0	76	1	300	0	300	0
9	A128	M	1	61	0	252	DD	0	IC	0	T3NxM0	3	1	III	pap	1			283	0	298	1	300	0
10	A150	M	1	64	0	256	DD	0	PC	1	T4N0M0	4	0	IVA	pap	1			50	1	300	0	300	0
11	A153	M	1	60	0	360	DD	0	IC	0	T3N0M0	3	1	III	pap	1			170	0	300	0	286	1
12	A157	M	1	51	1	1135	DD	0	PC	1	T2aN0M0	2	1	II	pap	1	3	1	113	1	300	0	300	0
13	A162	M	1	68	0	731	DD	0	IC	0	T3N1M0	4	0	IVA	pap	1			98	1	298	1	290	1
14	C008	M	1	47	1	384	DD	0	IC	0	T4NxM0	4	0	IVA	pap	1	10	0	57	1	298	1	292	1
15	C095	M	1	59	0	351	DD	0	IC	0	T3N1M1	4	0	IVB	pap	1	7.5	0	290	0	300	0	300	0
16	C107	F	0	49	1	115	DD	0	IC	0	T3N1Mx	4	0	IVA	pap	1	7	0	80	1	295	1	289	1
17	C144	M	1	52	1	1354	DD	0	IC	0	T4N0Mx	4	0	IVA	pap	1	5	1	100	1	293	1	299	1
18	C150	M	1	57	0	1069	DD	0	PC	1	T3NxMX	3	1	IIIA	pap	1	3	1	67	1	296	1	278	1
19	C151	M	1	73	0	542	DD	0	IC	0	T1N0Mx	1	1	I	pap	1	7	0	100	1	300	0	280	1
20	C154	M	1	59	0	212	DD	0	PC	1	T2bN1Mx	3	1	IIIB	pap	1	7	0	103	1	298	1	293	1
21	C164	F	0	60	0	488	DD	0	IC	0	T3N1Mx	4	0	IVA	pap	1	5.5	1	280	0	300	0	300	0
22	D013	M	1	50	1	523	DD	0	PC	1	T1N0M0	1	1	I	pap	1			117	1	300	0	300	0
23	D017	F	0	53	1	1162	DD	0	IC	0	T2aN0Mx	2	1	II	pap	1	6	1	30	1	300	0	300	0
24	D039	F	0	67	0	109	DD	0	IC	0	T4NxMx	4	0	IVA	pap	1	5	1	104	1	295	1	289	1
25	D053	M	1	62	0	381	DD	0	IC	0	T3N0Mx	3	1	III	pap	1	12.5	0	100	1	280	1	280	1
26	D106	M	1	54	1	373	DD	0	PC	1	T4N1Mx	4	0	IVA	pap	1	3	1	283	0	300	0	300	0
27	D113	M	1	70	0	297	DD	0	IC	0	T3N0Mx	3	1	III	pap	1	5	1	195	0	298	1	300	0
28	E025	F	0	57	0	34	DD	0	PC	1	T4N1Mx	4	0	IVA	pap	1	7	0	146	0	281	1	259	1
29	E028	M	1	51	1	187	DD	0	IC	0	T3N0Mx	3	1	III	pap	1	11	0	150	0	300	0	300	0
30	E053	F	0	61	0	506	DD	0	PC	1	T2aN1M0	3	1	III	pap	1			123	1	300	0	296	1
31	E071	F	0	60	0	346	DD	0	IC	0	T4N1Mx	4	0	IVA	pap	1	5	1	78	1	293	1	274	1
32	F044	F	0	42	1	1361	DD	0	PC	1	T2bN0Mx	2	1	II	pap	1	5	1	110	1	300	0	293	1
33	F004	M	1	65	0	72	DD	0	PC	1	T3N1Mx	3	1	IIIB	pap	1	6	1	270	0	300	0	300	0
34	F009	M	1	68	0	1199	DD	0	IC	0	T1N0Mx	1	1	I	pap	1	7	0	146	0	300	0	298	1
35	R149	M	1	37	1	475	DD	0	PC	1	T2bNxM0	2	1	II	pap	1	5	1	260	0	300	0	300	0
36	T160	M	1	46	1	2493	DD	0	IC	0	T4N0Mx	4	0	IVA	pap	1	6.8	1	255	0	300	0	300	0
37	U027	F	0	66	0	148	DD	0	IC	0	T1N0M0	1	1	I	pap	1	1	1	280	0	287	1	300	0
38	Y002	F	0	45	1	1868	DD	0	IC	0	T3N0M0	3	1	III	pap(IF-ID)	1	10	0	250	0	300	0	295	1
39	Y020	M	1	50	1	180	DD	0	IC	0	T3N1Mx	4	0	IVA	pap	1	14	0	230	0	300	0	300	0
40	Y023	M	1	62	0	1302	DD	0	IC	0	T4N0Mx	4	0	IVA	pap	1	6	1	193	0	288	1	290	1
41	Y032	M	1	69	0	429	DD	0	IC	0	T3N1Mx	4	0	IVA	pap	1	8	0	145	0	299	1	300	0
42	Y065	M	1	63	0	558	DD	0	IC	0	T4N1Mx	4	0	IVA	pap	1	7	0	225	0	300	0	300	0
43	Y140	F	0	56	0	2593	DD	0	PC	1	T1N0M0	1	1	I	pap	1			236	0	300	0	300	0
				57
				56													7		145		300		300
